# Supplementary material
Source: Springer Nature journal article supplement (https://www.springermedizin.de/resource/supplementary/12967_2008_338_MOESM3_ESM.pdf/9576252)

**A)**

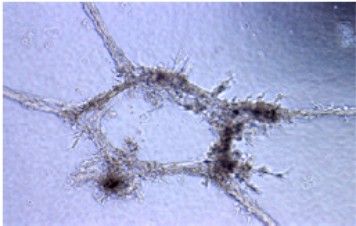

**B)**

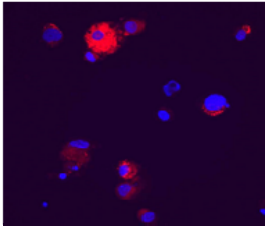

Supplement: MOESM3 [file 9576252]
